# Supplementary material for: Impact of Omalizumab in Patients with Severe Uncontrolled Asthma and Possible Predictive Biomarkers of Response: A Real-Life Study
Source: MDPI journal article supplement (doi:10.3390/pharmaceutics15020523), 2023-02-04
Supplement: s1 [file s1]

# Supplementary Materials: Impact of Omalizumab in Patients with Severe Uncontrolled Asthma and Possible Predictive Biomarkers of Response: A Real-Life Study

Susana Rojo-Tolosa, María Victoria González-Gutiérrez, José Antonio Sánchez-Martínez, Gonzalo Jiménez-Gálvez, Laura Elena Pineda-Lancheros, José María Gálvez-Navas, Alberto Jiménez-Morales, Cristina Pérez-Ramírez and Concepción Morales-García

**Table S1.** Predictors of oral corticosteroid reduction at 12 months of omalizumab treatment in patients with severe uncontrolled asthma (bivariate analysis).

|                              | Response to oral corticosteroid reduction |                |               |         |                         |    |                   |
|------------------------------|-------------------------------------------|----------------|---------------|---------|-------------------------|----|-------------------|
| Independent variable         | N                                         | Unsatisfactory | Successful    | p-value | Reference cate-<br>gory | OR | CI <sub>95%</sub> |
| Age                          | 110                                       | 51.62 ± 2.76   | 46.86 ± 15.55 | 0.132   | -                       | -  | -                 |
| Sex                          |                                           |                |               |         |                         |    |                   |
| Female                       | 68                                        | 23 (33.8)      | 45 (66.2)     | 0.649   | -                       | -  | -                 |
| Male                         | 42                                        | 16 (38.1)      | 26 (61.9)     |         |                         |    |                   |
| BMI                          |                                           |                |               |         |                         |    |                   |
| Underweight                  | 1                                         | 1 (100)        | 0 (0)         | 0.086*  | -                       | -  | -                 |
| Normal weight                | 27                                        | 5 (18.5)       | 22 (81.5)     |         |                         |    |                   |
| Overweight                   | 44                                        | 18 (40.9)      | 26 (59.1)     |         |                         |    |                   |
| Obesity                      | 38                                        | 15 (39.5)      | 23 (60.5)     |         |                         |    |                   |
| Tobacco consumption          |                                           |                |               |         |                         |    |                   |
| Non smoker                   | 77                                        | 29 (37.7)      | 48 (62.3)     | 0.674   | -                       | -  | -                 |
| Former smoker                | 28                                        | 8 (28.6)       | 20 (71.4)     |         |                         |    |                   |
| Current smoker               | 5                                         | 2 (40.0)       | 3 (60.0)      |         |                         |    |                   |
| Previous respiratory disease |                                           |                |               |         |                         |    |                   |
| Yes                          | 23                                        | 10 (43.5)      | 13 (56.5)     | 0.366   | -                       | -  | -                 |
| No                           | 87                                        | 29 (33.3)      | 58 (66.7)     |         |                         |    |                   |
| Polyps                       |                                           |                |               |         |                         |    |                   |
| Yes                          | 21                                        | 10 (47.6)      | 11 (52.4)     | 0.195   | -                       | -  | -                 |
| No                           | 89                                        | 29 (32.6)      | 60 (67.4)     |         |                         |    |                   |
| Allergies                    |                                           |                |               |         |                         |    |                   |
| Yes                          | 83                                        | 30 (36.1)      | 53 (63.9)     | 0.791   | -                       | -  | -                 |
| No                           | 27                                        | 9 (33.3)       | 18 (66.7)     |         |                         |    |                   |
| GERD                         |                                           |                |               |         |                         |    |                   |
| Yes                          | 30                                        | 14 (46.7)      | 16 (53.3)     | 0.132   | -                       | -  | -                 |

|                                    |     |                   |                   |       |   |      |             |
|------------------------------------|-----|-------------------|-------------------|-------|---|------|-------------|
| No                                 | 80  | 25 (31.2)         | 55 (68.8)         |       |   |      |             |
| SAHS                               |     |                   |                   |       |   |      |             |
| Yes                                | 20  | 10 (50)           | 10 (50)           | 0.133 | - | -    | -           |
| No                                 | 90  | 29 (32.2)         | 61 (67.8)         |       |   |      |             |
| COPD                               |     |                   |                   |       |   |      |             |
| Yes                                | 16  | 6 (37.5)          | 10 (62.4)         | 0.853 | - | -    | -           |
| No                                 | 94  | 33 (35.1)         | 61 (64.9)         |       |   |      |             |
| Years with AE                      | 110 | 10 [5-14]         | 8 [4-13.5]        | 0.651 | - | -    | -           |
| ICS (mg/day)                       | 110 | 320 [184-620]     | 400 [184-640]     | 0.472 | - | -    | -           |
| OCS cycles per year                | 110 | 2 [0.5-3]         | 2 [1-3]           | 0.788 | - | -    | -           |
| Yes                                | 85  | 29 (34.1)         | 56 (65.9)         | 0.589 | - | -    | -           |
| No                                 | 25  | 10 (40)           | 15 (60)           |       |   |      |             |
| Baseline FEV1 (%)                  | 106 | 72.74 ± 21.25     | 77.96 ± 21.86     | 0.245 | - | -    | -           |
| Baseline ACT                       | 25  | 15 [12.5-16.5]    | 11 [9-13]         | 0.045 | - | 0.74 | [0.53-0.97] |
| Exacerbation in previous year      | 110 | 1 [0-2]           | 1 [0-2]           | 0.807 | - | -    | -           |
| Yes                                | 68  | 26 (38.2)         | 42 (61.8)         | 0.438 | - | -    | -           |
| No                                 | 42  | 13 (31)           | 29 (69)           |       |   |      |             |
| Basal blood eosinophils (cell/mcl) | 100 | 195 [110.3-347.5] | 300 [152.5-550]   | 0.067 | - | -    | -           |
| Baseline IgE (IU/ML)               | 96  | 319.5 [142.5-666] | 310.5 [143-752.9] | 0.910 | - |      |             |
| Years with omalizumab              | 110 | 3 [1-5]           | 2 [1-5]           | 0.746 | - |      |             |
| Omalizumab dose (mg/4 weeks)       | 110 | 600 [300-750]     | 300 [150-450]     | 0.052 | - | 0.99 | [0.99-1]    |

BMI, body mass index; GERD, gastro-oesophageal reflux disease; SAHS, sleep apnoea-hypopnoea syndrome; COPD, chronic obstructive pulmonary disease; EC, eosinophilic asthma; ICS, inhaled corticosteroids; OCS, oral corticosteroids; FEV1, peak expiratory volume in the first second of forced expiration; ACT, Asthma Control Test; IgE, immunoglobulin E; OR, Odds ratio; CI95%, 95% confidence interval.

\*Fisher's exact test

**Table S2.** Predictors of lung function improvement at 12 months of omalizumab treatment in patients with severe uncontrolled asthma (bivariate analysis).

| Independent variable | Response to improved lung function |                |               |         |                    |      |                   |
|----------------------|------------------------------------|----------------|---------------|---------|--------------------|------|-------------------|
|                      | N                                  | Unsatisfactory | Satisfactory  | p-value | Reference category | OR   | CI <sub>95%</sub> |
| Age                  | 91                                 | 48.16 ± 15.66  | 49.73 ± 16.48 | 0.638   | -                  | -    | -                 |
| Sex                  |                                    |                |               |         |                    |      |                   |
| Female               | 57                                 | 26 (45.6)      | 31 (54.4)     | 0.041   | Male               | 2.49 | [1.04-6.22]       |
| Male                 | 34                                 | 23 (67.6)      | 11 (32.4)     |         |                    |      |                   |

|                               |    |               |                  |        |     |      |              |
|-------------------------------|----|---------------|------------------|--------|-----|------|--------------|
| BMI                           |    |               |                  |        |     |      |              |
| Underweight                   | -  | -             | -                | 1*     | -   | -    | -            |
| Normal weight                 | 23 | 12 (52.2)     | 11 (47.8)        |        |     |      |              |
| Overweight                    | 30 | 16 (53.3)     | 14 (46.7)        |        |     |      |              |
| Obesity                       | 38 | 21 (55.3)     | 17 (44.7)        |        |     |      |              |
| Tobacco consumption           |    |               |                  |        |     |      |              |
| Non smoker                    | 5  | 2 (40)        | 3 (60)           | 0.656* | -   | -    | -            |
| Former smoker                 | 21 | 10 (47.6)     | 11 (52.4)        |        |     |      |              |
| Current smoker                | 65 | 37 (56.9)     | 28 (43.1)        |        |     |      |              |
| Previous respiratory disease  |    |               |                  |        |     |      |              |
| Yes                           | 20 | 11 (55)       | 9 (45)           | 0.907  | -   | -    | -            |
| No                            | 71 | 38 (53.5)     | 33 (46.5)        |        |     |      |              |
| Polyps                        |    |               |                  |        |     |      |              |
| Yes                           | 18 | 8 (44.4)      | 10 (55.6)        | 0.372  | -   | -    | -            |
| No                            | 73 | 41 (56.2)     | 32 (43.8)        |        |     |      |              |
| Allergies                     |    |               |                  |        |     |      |              |
| Yes                           | 66 | 33 (50)       | 33 (50)          | 0.232  | -   | -    | -            |
| No                            | 25 | 16 (64)       | 9 (36)           |        |     |      |              |
| GERD                          |    |               |                  |        |     |      |              |
| Yes                           | 24 | 13 (54.2)     | 11 (45.8)        | 0.971  | -   | -    | -            |
| No                            | 67 | 36 (53.7)     | 31 (46.3)        |        |     |      |              |
| SAHS                          |    |               |                  |        |     |      |              |
| Yes                           | 18 | 12 (66.7)     | 6 (33.3)         | 0.223  | -   | -    | -            |
| No                            | 73 | 37 (50.7)     | 36 (49.3)        |        |     |      |              |
| COPD                          |    |               |                  |        |     |      |              |
| Yes                           | 12 | 10 (83.3)     | 2 (16.7)         | 0.029  | Yes | 5.13 | [1.25-34.77] |
| No                            | 79 | 39 (49.4)     | 40 (50.6)        |        |     |      |              |
| Years with AE                 | 91 | 9 [5-15]      | 9 [7-12]         | 0.913  | -   | -    | -            |
| ICS (mg/day)                  | 91 | 400 [184-640] | 440 [200-640]    | 0.398  | -   | -    | -            |
| OCS cycles per year           | 91 | 2 [0-3]       | 2 [1-3]          | 0.603  | -   | -    | -            |
| Yes                           | 69 | 35 (50.7)     | 34 (49.3)        | 0.2901 | -   | -    | -            |
| No                            | 22 | 14 (63.6)     | 8 (36.4)         |        |     |      |              |
| Baseline FEV1 (%)             | 91 | 82.73 ± 19.95 | 65.48 ± 18.15    | <0.001 | -   | 0.95 | [0.92-0.98]  |
| <80                           | 55 | 22 (40)       | 33 (60)          | 0.001  | >80 | 4.50 | [1.83-11.86] |
| >80                           | 36 | 27 (75)       | 9 (25)           |        |     |      |              |
| Baseline ACT                  | 76 | 10 [9.5-14]   | 11.5 [10.8-15.3] | 0.531  | -   | -    | -            |
| Exacerbation in previous year | 91 | 1 [0-2]       | 1 [0-2]          | 0.711  | -   | -    | -            |

|                                    |    |                      |                   |       |   |   |   |
|------------------------------------|----|----------------------|-------------------|-------|---|---|---|
| Yes                                | 57 | 31 (54.4)            | 26 (45.6)         | 0.894 | - | - | - |
| No                                 | 34 | 18 (52.9)            | 16 (47.1)         |       |   |   |   |
| Basal blood eosinophils (cell/mcl) | 81 | 290 [145-465]        | 255 [160-567.5]   | 0.534 | - | - | - |
| Baseline IgE (IU/MI)               | 80 | 415.5 [145.5-1012.5] | 342 [158.5-689.3] | 0.685 | - | - | - |
| Years with omalizumab              | 91 | 3 [1-5]              | 4 [1.3-5.8]       | 0.368 | - | - | - |

BMI, body mass index; GERD, gastro-oesophageal reflux disease; SAHS, sleep apnoea-hypopnoea syndrome; COPD, chronic obstructive pulmonary disease; EC, eosinophilic asthma; ICS, inhaled corticosteroids; OCS, oral corticosteroids; FEV1, peak expiratory volume in the first second of forced expiration; ACT, Asthma Control Test; IgE, immunoglobulin E; OR, Odds ratio; CI95%, 95% confidence interval.

**Table S3.** Predictors of exacerbation reduction at 12 months of omalizumab treatment in patients with severe uncontrolled asthma (bivariate analysis).

| Independent variable         | Response to exacerbation reduction |                |              |         |                    |          |                   |
|------------------------------|------------------------------------|----------------|--------------|---------|--------------------|----------|-------------------|
|                              | N                                  | Unsatisfactory | Satisfactory | p-value | Reference category | OR       | CI <sub>95%</sub> |
| Age                          | 110                                | 50.65 ± 12.58  | 48 ± 16.78   | 0.504   | -                  | -        | -                 |
| Sex                          |                                    |                |              |         |                    |          |                   |
| Female                       | 68                                 | 12 (17.6)      | 56 (82.4)    | 0.853   | -                  | -        | -                 |
| Male                         | 42                                 | 8 (19)         | 34 (81)      |         |                    |          |                   |
| BMI                          |                                    |                |              |         |                    |          |                   |
| Underweight                  | 1                                  | 0 (0)          | 1 (100)      | 0.076*  | -                  | 2.17e-06 | [NA-5.72e+122]    |
| Normal weight                | 27                                 | 2 (7.4)        | 25 (92.6)    |         |                    |          |                   |
| Overweight                   | 38                                 | 5 (13.2)       | 33 (86.8)    |         |                    |          |                   |
| Obesity                      | 44                                 | 13 (29.5)      | 31 (70.5)    |         |                    |          |                   |
| Tobacco consumption          |                                    |                |              |         |                    |          |                   |
| Non smoker                   | 77                                 | 15 (19.5)      | 62 (80.5)    | 0.906*  | -                  | -        | -                 |
| Former smoker                | 28                                 | 4 (14.3)       | 24 (85.7)    |         |                    |          |                   |
| Current smoker               | 5                                  | 1 (20)         | 4 (80)       |         |                    |          |                   |
| Previous respiratory disease |                                    |                |              |         |                    |          |                   |
| Yes                          | 23                                 | 4 (17.4)       | 19 (82.6)    | 0.912   | -                  | -        | -                 |
| No                           | 87                                 | 16 (18.4)      | 71 (81.6)    |         |                    |          |                   |

|                                    |     |                 |                 |       |     |      |              |
|------------------------------------|-----|-----------------|-----------------|-------|-----|------|--------------|
| Polyps                             |     |                 |                 |       |     |      |              |
| Yes                                | 21  | 7 (33.3)        | 14 (66.7)       | 0.045 | Yes | 2.93 | [0.96-8.54]  |
| No                                 | 89  | 13 (14.6)       | 76 (85.4)       |       |     |      |              |
| Allergies                          |     |                 |                 |       |     |      |              |
| Yes                                | 83  | 17 (20.5)       | 66 (79.5)       | 0.273 | -   | -    | -            |
| No                                 | 27  | 3 (11.1)        | 24 (88.9)       |       |     |      |              |
| GERD                               |     |                 |                 |       |     |      |              |
| Yes                                | 30  | 10 (33.3)       | 20 (66.7)       | 0.012 | Yes | 3.50 | [1.27-9.73]  |
| No                                 | 80  | 10 (12.5)       | 70 (87.5)       |       |     |      |              |
| SAHS                               |     |                 |                 |       |     |      |              |
| Yes                                | 20  | 6 (30)          | 14 (70)         | 0.196 | -   | -    | -            |
| No                                 | 90  | 14 (15.6)       | 76 (84.4)       |       |     |      |              |
| COPD                               |     |                 |                 |       |     |      |              |
| Yes                                | 16  | 3 (18.8)        | 13 (81.2)       | 0.949 | -   | -    | -            |
| No                                 | 94  | 17 (18.1)       | 77 (81.9)       |       |     |      |              |
| Years with AE                      | 110 | 9 [5-12]        | 8 [4.3-14]      | 0.810 | -   | -    | -            |
| ICS (mg/day)                       | 110 | 400 [184-850]   | 320 [184-640]   | 0.302 | -   | -    | -            |
| OCS cycles per year                | 110 | 2 [0-4]         | 2 [1-3]         | 0.735 | -   | -    | -            |
| Yes                                | 85  | 14 (16.5)       | 71 (83.5)       | 0.391 |     | -    | -            |
| No                                 | 25  | 6 (24)          | 19 (76)         |       |     |      |              |
| Baseline FEV1 (%)                  | 106 | 68 ± 18.25      | 78.01 ± 22.07   | 0.067 | -   | 1.02 | [0.99-1.04]  |
| <80                                | 62  | 16 (25.8)       | 46 (74.2)       | 0.030 | <80 | 3.48 | [1.16-12.90] |
| >80                                | 44  | 4 (9.1)         | 40 (90.9)       |       |     |      |              |
| Baseline ACT                       | 25  | 13.5 [10.8-16]  | 12 [9-15]       | 0.551 | -   | -    | -            |
| Exacerbation in previous year      | 110 | 1 [0-2]         | 1 [0-2]         | 0.756 | -   | -    | -            |
| Yes                                | 68  | 14 (20.6)       | 54 (79.4)       | 0.405 | -   | -    | -            |
| No                                 | 42  | 6 (14.3)        | 36 (85.7)       |       |     |      |              |
| Basal blood eosinophils (cell/mcl) | 100 | 245 [130-557.5] | 250 [135-472.5] | 0.250 | -   | -    | -            |

|                              |     |               |                 |       |   |   |   |
|------------------------------|-----|---------------|-----------------|-------|---|---|---|
| Baseline IgE (IU/MI)         | 96  | 402 [169-644] | 297 [134.5-750] | 0.786 | - |   |   |
| Years with omalizumab        | 110 | 2.5 [1-3.25]  | 2.5 [1-5]       | 0.793 | - |   |   |
| Omalizumab dose (mg/4 weeks) | 110 | 575 [300-600] | 300 [300-600]   | 0.218 | - | - | - |

BMI, body mass index; GERD, gastro-oesophageal reflux disease; SAHS, sleep apnoea-hypopnoea syndrome; COPD, chronic obstructive pulmonary disease; EC, eosinophilic asthma; ICS, inhaled corticosteroids; OCS, oral corticosteroids; FEV1, peak expiratory volume in the first second of forced expiration; ACT, Asthma Control Test; IgE, immunoglobulin E; OR, Odds ratio; CI95%, 95% confidence interval.

\*Fisher's exact test
